# Supplementary material for: Association of anthropometric indices of obesity with hypertension among public employees in northern Ethiopia: findings from a cross-sectional survey
Source: HighWire-hosted journal article supplement (doi:10.1136/bmjopen-2021-050969), 2021-09-01
Supplement: bmjopen-2021-050969supp001_data_supplement.pdf [file bmjopen-2021-050969supp001_data_supplement.pdf]

Supplementary Table 1: Age-adjusted proportion of socio-demographic and behavioural variables according to waist circumference categories and sex, %

| Sex                                 | Men                     |        |           |           |           | Women |        |           |           |           |      |
|-------------------------------------|-------------------------|--------|-----------|-----------|-----------|-------|--------|-----------|-----------|-----------|------|
|                                     | Waist circumference, cm | ≤ 80.9 | 81.0-84.9 | 85.0-90.9 | 91.0-94.0 | > 94  | ≤ 80.9 | 81.0-84.9 | 85.0-90.9 | 91.0-94.0 | > 94 |
|                                     | n                       | 175    | 118       | 159       | 111       | 254   | 221    | 66        | 77        | 67        | 119  |
| Income, Ethiopian birr              |                         |        |           |           |           |       |        |           |           |           |      |
|                                     | ≥ 3001                  | 48.4   | 55.5      | 64.6      | 68.0      | 72.7  | 56.3   | 54.5      | 71.8      | 65.2      | 73.6 |
| Marital status                      |                         |        |           |           |           |       |        |           |           |           |      |
|                                     | Currently married       | 63.4   | 70.4      | 69.4      | 75.5      | 76.0  | 47.0   | 57.6      | 66.2      | 62.7      | 77.3 |
| Smoking                             |                         |        |           |           |           |       |        |           |           |           |      |
|                                     | Ever smoked             | 6.5    | 4.5       | 7.7       | 11.5      | 12.7  | 0.3    | 3.1       | 1.2       | 2.7       | 0.5  |
| <i>Khat</i> chewing                 |                         |        |           |           |           |       |        |           |           |           |      |
|                                     | Ever chewed             | 4.1    | 7.7       | 10.7      | 11.8      | 11.9  | 0.4    | 1.6       | 2.7       | 1.6       | 0.1  |
| Alcohol drinking, per week          |                         |        |           |           |           |       |        |           |           |           |      |
|                                     | 1-7 days                | 41.2   | 38.9      | 48.4      | 50.6      | 55.8  | 3.0    | 6.9       | 6.0       | 5.3       | 10.8 |
| Fruit and vegetable intake, per day |                         |        |           |           |           |       |        |           |           |           |      |
|                                     | ≥ 3 servings            | 2.3    | 4.1       | 5.0       | 3.8       | 5.2   | 5.1    | 4.5       | 4.1       | 4.7       | 6.9  |

Supplementary Table 2: Age-adjusted proportion of socio-demographic and behavioural variables according to waist-hip ratio categories and sex, %

|                                     | Sex             |        |           |           |        | Women  |           |           |        |
|-------------------------------------|-----------------|--------|-----------|-----------|--------|--------|-----------|-----------|--------|
|                                     | Waist-hip ratio | < 0.80 | 0.81-0.84 | 0.85-0.89 | ≥ 0.90 | < 0.80 | 0.81-0.84 | 0.85-0.89 | ≥ 0.90 |
|                                     | n               | 58     | 94        | 165       | 414    | 156    | 96        | 111       | 139    |
| Income, Ethiopian birr              |                 |        |           |           |        |        |           |           |        |
| ≥ 3001                              |                 | 52.3   | 60.7      | 57.6      | 67.8   | 52.3   | 69.8      | 62.6      | 71.1   |
| Marital status                      |                 |        |           |           |        |        |           |           |        |
| Currently married                   |                 | 59.6   | 64.7      | 72.0      | 74.3   | 45.5   | 62.5      | 62.9      | 71.4   |
| Smoking                             |                 |        |           |           |        |        |           |           |        |
| Ever smoked                         |                 | 7.7    | 3.9       | 8.8       | 11.9   | 0.3    | 0.2       | 1.7       | 1.9    |
| <i>Khat</i> chewing                 |                 |        |           |           |        |        |           |           |        |
| Ever chewed                         |                 | 5.2    | 5.4       | 8.5       | 11.7   | 0.4    | 0.2       | 1.0       | 2.4    |
| Alcohol drinking, per week          |                 |        |           |           |        |        |           |           |        |
| 1-7 days                            |                 | 41.8   | 40.1      | 42.4      | 52.3   | 3.8    | 4.0       | 7.7       | 8.0    |
| Fruit and vegetable intake, per day |                 |        |           |           |        |        |           |           |        |
| ≥ 3 servings                        |                 | 1.4    | 2.9       | 6.1       | 4.1    | 6.5    | 1.1       | 5.6       | 5.1    |
